# Supplementary material for: Genome-Wide Transcriptome Analysis Reveals Conserved and Distinct Molecular Mechanisms of Al Resistance in Buckwheat (Fagopyrum esculentum Moench) Leaves
Source: MDPI journal article supplement (doi:10.3390/ijms18091859), 2017-08-27
Supplement: s1 [file s1]

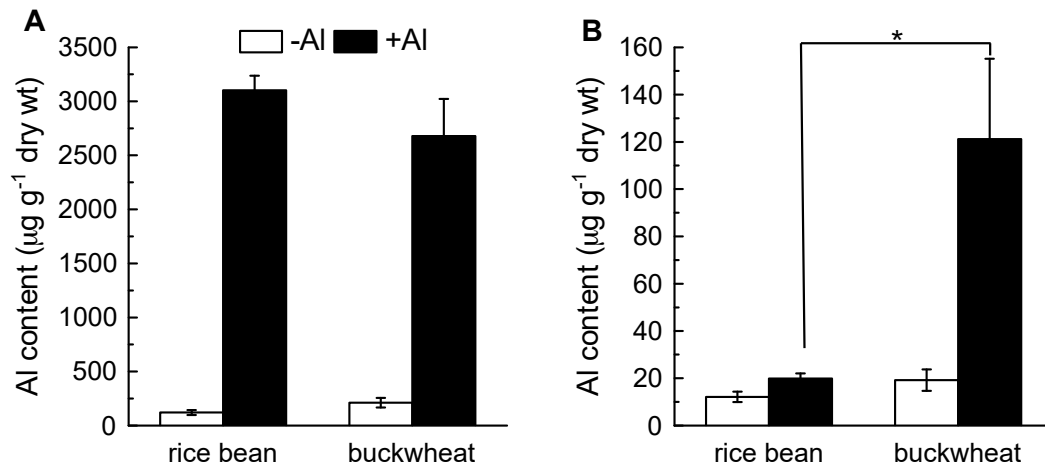

**Supplemental Figure S1.** Al accumulation in roots and shoots of rice bean and buckwheat. Two-week-old seedlings were exposed to 1/5 strength low-phosphate (10  $\mu\text{M}$ ) Hoagland nutrient solution containing 0 or 20  $\mu\text{M}$  Al for 24 h. Al concentration in roots (**A**) and shoot (**B**) were determined by inductively coupled plasma atomic emission spectrometry. Data are means  $\pm$  SD ( $n = 4$ ). Asterisk represents statistically significant difference ( $t$ -test,  $p < 0.05$ ).

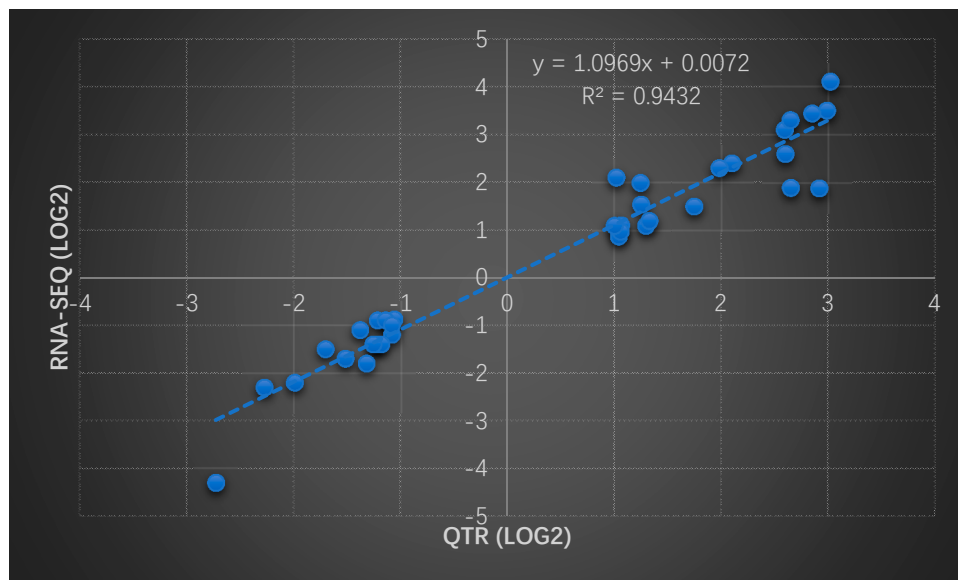

**Supplemental Figure S2.** Correlation of gene expression levels between RNA-seq data and qRT-PCR analysis. Twenty upregulated and fifteen downregulated genes were selected and subjected to qRT-PCR analysis using the same RNA as for RNA-seq. 18S rRNA was used as an internal standard. RNA-seq data were plotted against data from qRT-PCR. Both  $x$ - and  $y$ -axes are shown in  $\log_2$  scale.
